# Supplementary material
Source: Springer Nature journal article supplement (https://www.springermedizin.de/resource/supplementary/12889_2010_2923_MOESM2_ESM.pdf/9487676)
Supplement: MOESM2 [file 9487676]

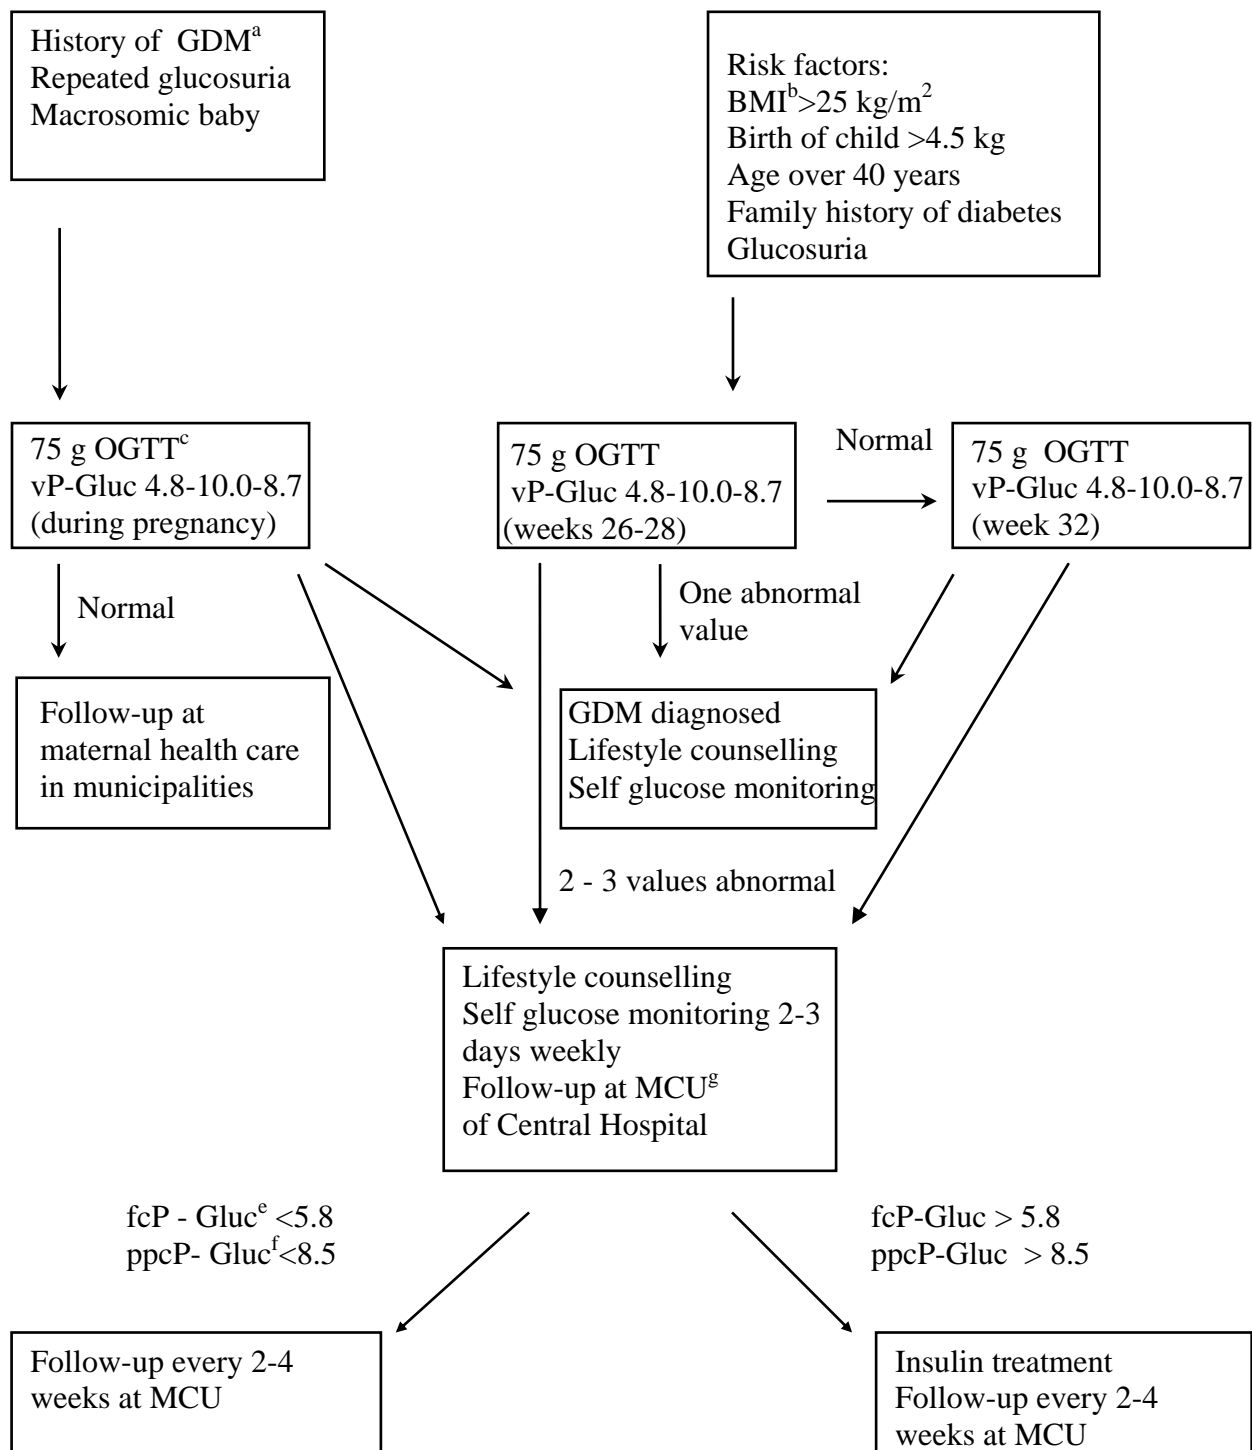

<sup>a</sup>Gestational diabetes mellitus, <sup>b</sup>Body-mass index, <sup>c</sup>Oral glucose tolerance test, <sup>d</sup>venous plasma glucose, <sup>e</sup>fasting capillary plasma glucose, <sup>f</sup>post prandial capillary plasma glucose, <sup>g</sup>Maternal care unit
